# Supplementary material for: Evolution and Biological Evaluation of Matrinic Derivatives with Amantadine Fragments As New Anti-Influenza Virus Agents
Source: MDPI journal article supplement (doi:10.3390/molecules24050921), 2019-03-06
Supplement: s1 [file s1]

# Evolution and Biological Evaluation of Matrinic Derivatives with Amantadine Fragments As New Anti-Influenza Virus Agents

Tianyu Niu <sup>†</sup>, Xiaoqiang Zhao <sup>†</sup>, Jing Jiang, Haiyan Yan, Yinghong Li, Sheng Tang <sup>\*</sup>, Yuhuan Li <sup>\*</sup> and Danqing Song

Beijing Key Laboratory of Anti-infective Agents, Institute of Medicinal Biotechnology, Chinese Academy of Medical Science & Peking Union Medical College, Beijing, 10005, China; [niutianyu@163.com](mailto:niutianyu@163.com) (T.N.); [xiaoqiangzhao@126.com](mailto:xiaoqiangzhao@126.com) (X.Z.); [18299093210@163.com](mailto:18299093210@163.com) (J.J.); [yan0495@163.com](mailto:yan0495@163.com) (H.Y.); [livinghong@imb.pumc.edu.cn](mailto:livinghong@imb.pumc.edu.cn) (Y.L.); [songdanqingsdq@hotmail.com](mailto:songdanqingsdq@hotmail.com) (D.S.)  
<sup>\*</sup> Correspondence: [tang13874204108@163.com](mailto:tang13874204108@163.com) (S.T.); [yuhuanlibj@126.com](mailto:yuhuanlibj@126.com) (Y.L.); Tel.: +86-106-303-3012 (S.T); Tel.: +86-106-303-3012 (Y.L.)  
<sup>†</sup> These authors contribute equally to this work.

**Figure 1S-24S: <sup>1</sup>H NMR and <sup>13</sup>CNMR spectrum of all new compounds 9a—9l**

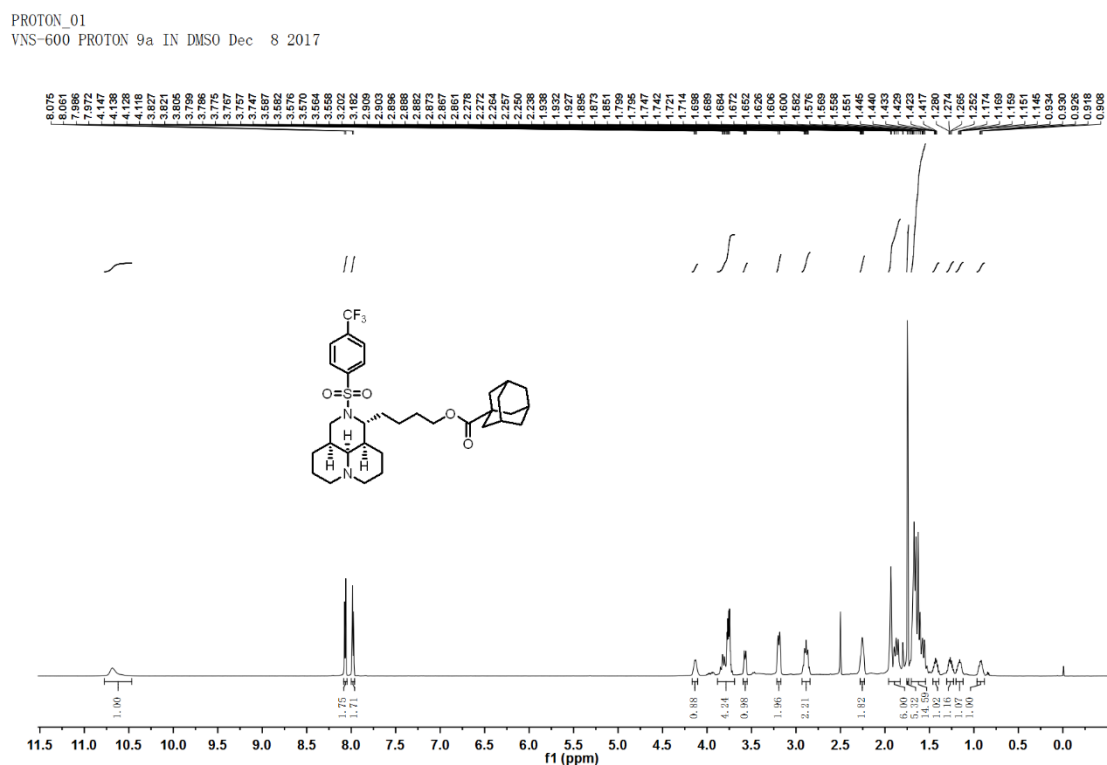

**Figure 1S. <sup>1</sup>H NMR spectrum of compound of 9a**

CARBON\_01  
VNS-600 CARBON 9a IN DMSO Dec 8 2017

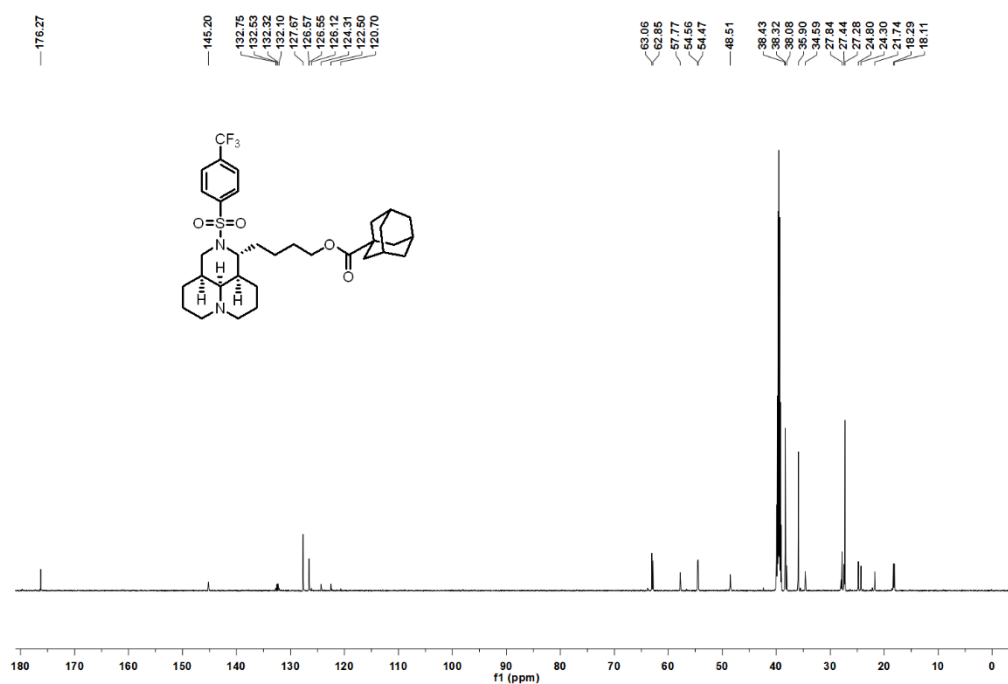

**Figure 2S.  $^{13}\text{C}$  NMR spectrum of compound of 9a**

PROTON\_01  
VNS-600 PROTON 9b IN DMOS Dec 8 2017

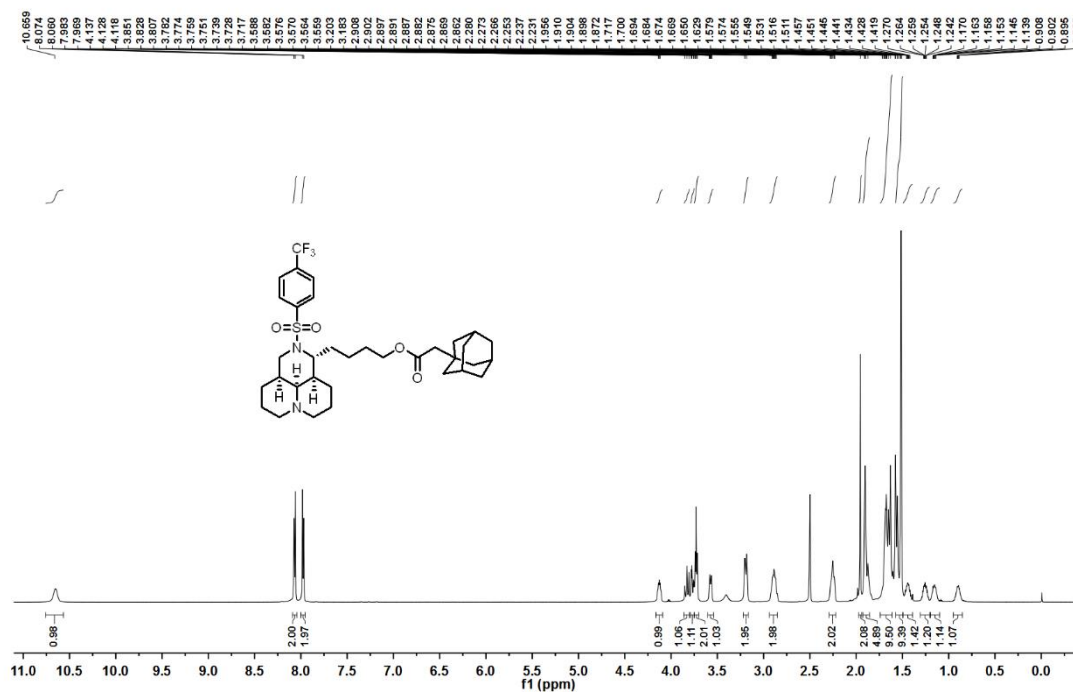

**Figure 3S.**  $^1\text{H}$  NMR spectrum of compound of **9b**

CARBON\_01  
VNS-600 CARBON 9b IN DMSO Dec 8 2017

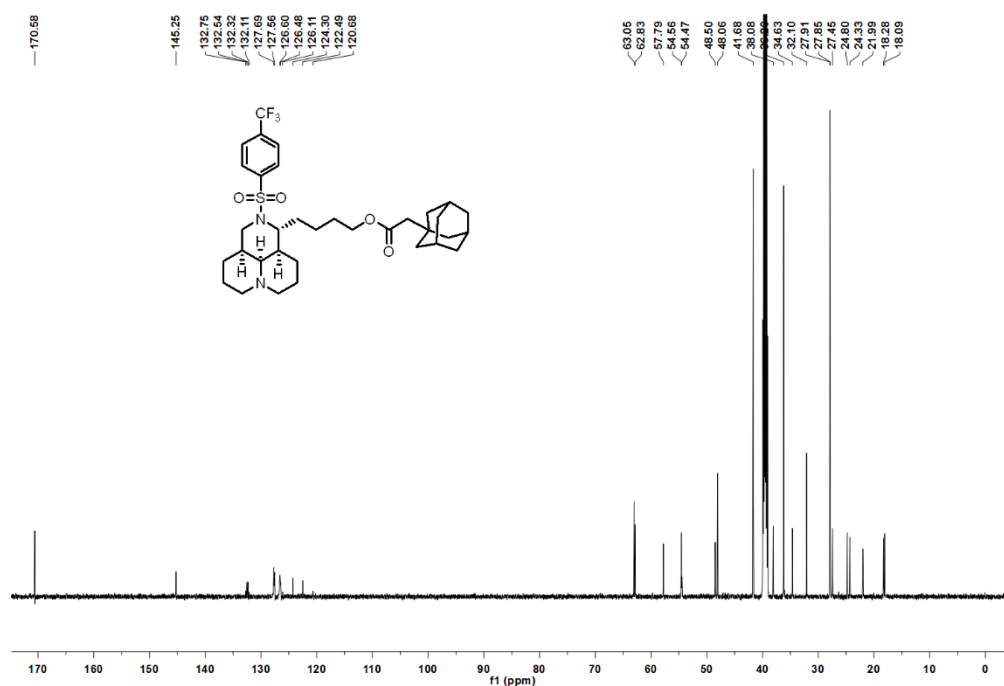

Figure 4S. <sup>13</sup>C NMR spectrum of compound of 9b

PROTON\_01  
VNS-600 PROTON 9c IN DMSO Jul 9 2018

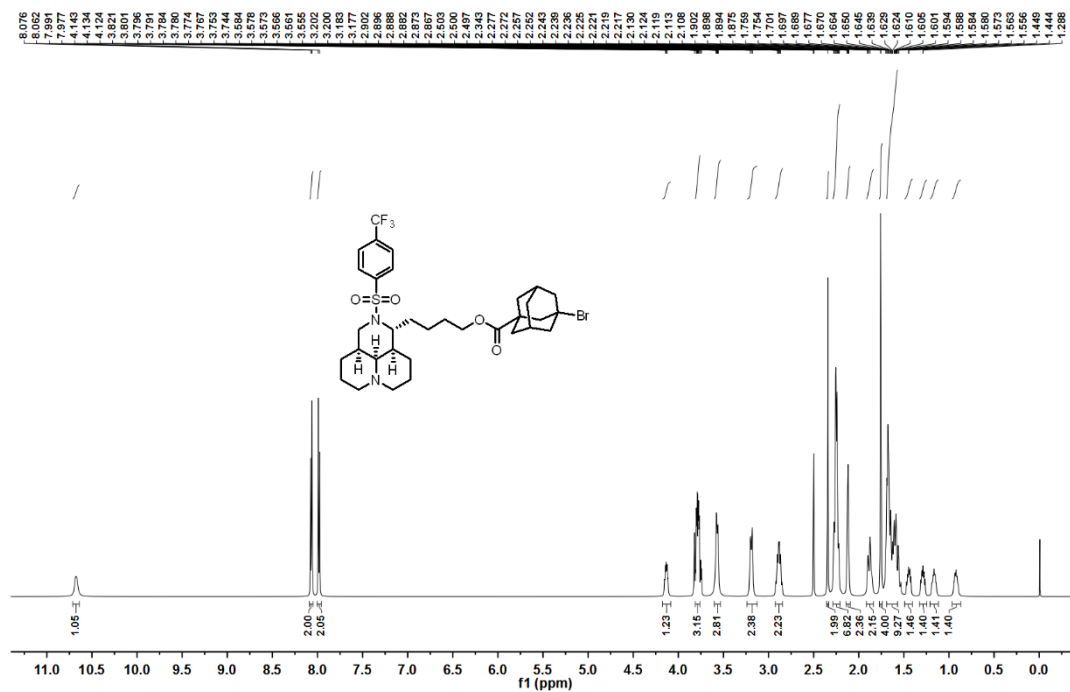

Figure 5S. <sup>1</sup>H NMR spectrum of compound of 9c

CARBON\_01  
VNS-600 CARBON 9c IN DMSO Jul 9 2018

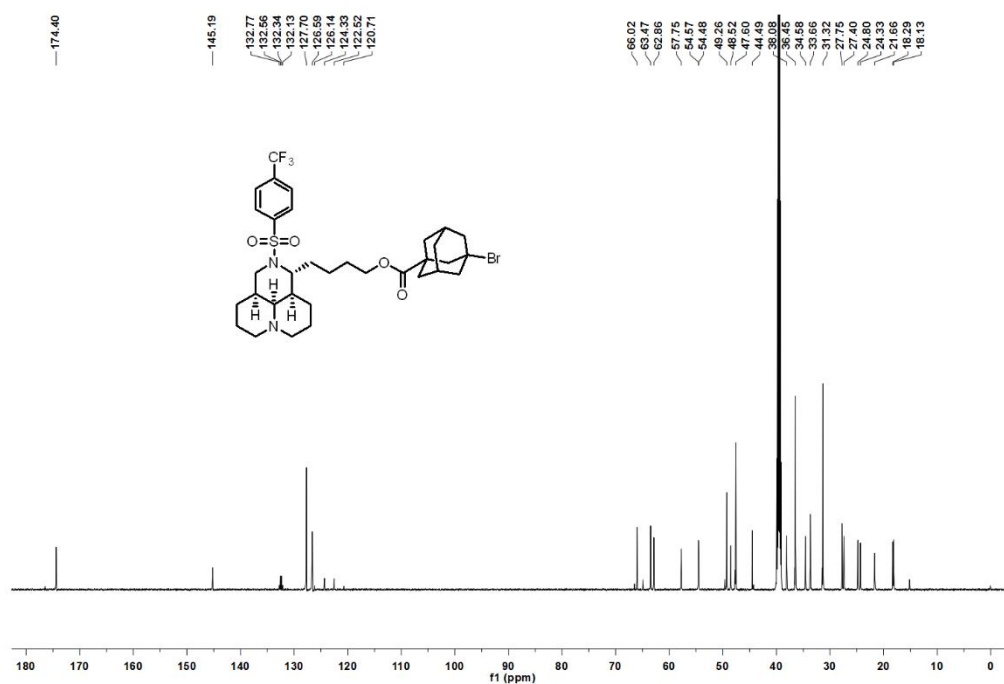

Figure 6S. <sup>13</sup>C NMR spectrum of compound of 9c

PROTON\_01  
VNS-600 PROTON 9d IN DMSO Dec 8 2017

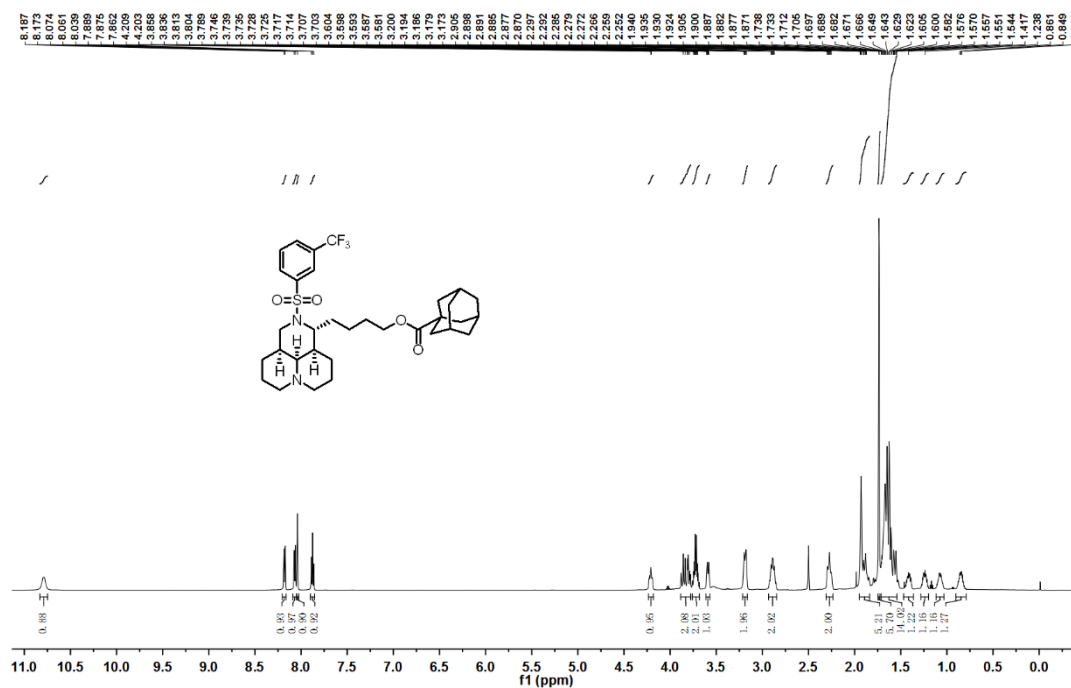

Figure 7S. <sup>1</sup>H NMR spectrum of compound of 9d

VNS-600 CARBON 9d IN DMSO Dec 8 2017

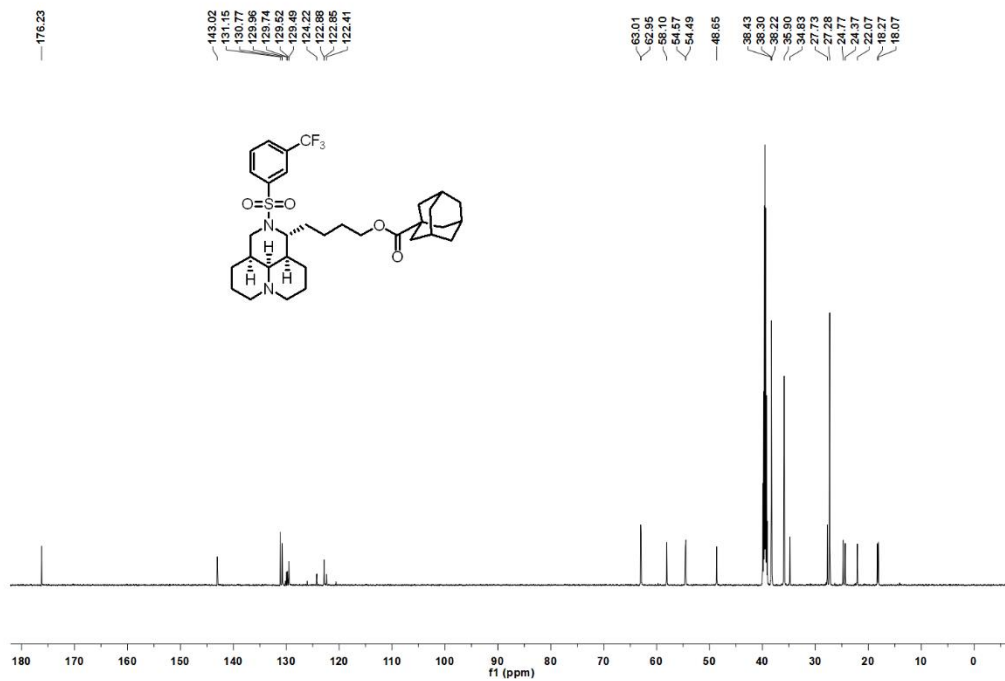

**Figure 8S.  $^{13}\text{C}$  NMR spectrum of compound of 9d**

VNS-600 PROTON 9e IN DMSO Dec 8 2017

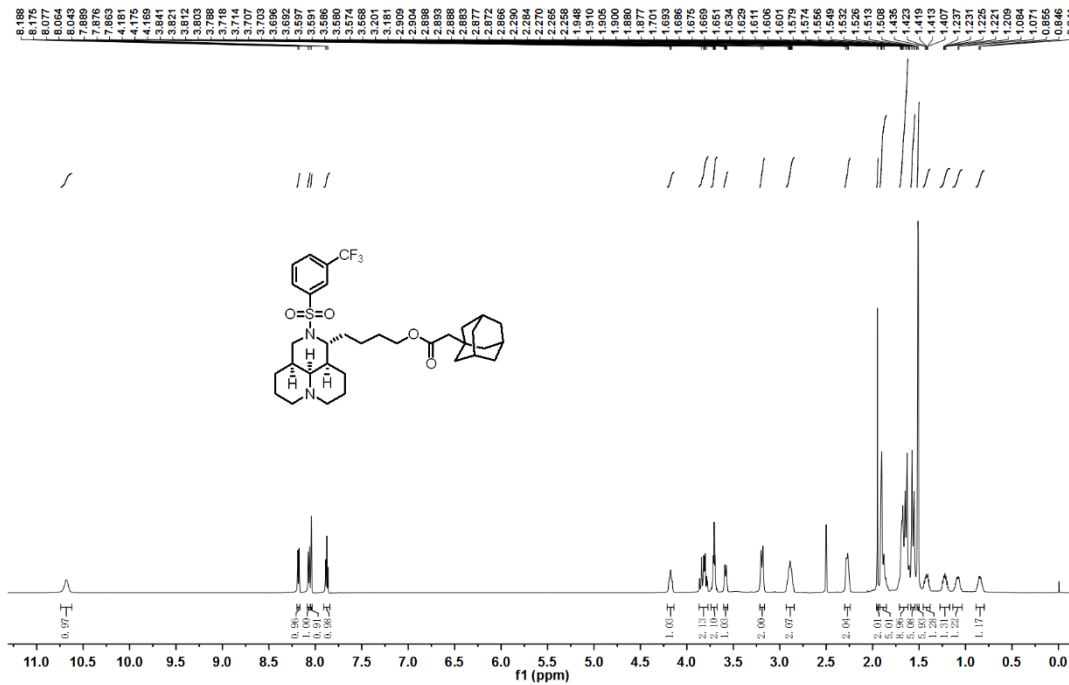

**Figure 9S.  $^1\text{H}$  NMR spectrum of compound of 9e**

CARBON\_01  
VNS-600 CARBON 9e IN DMSO Dec 8 2017

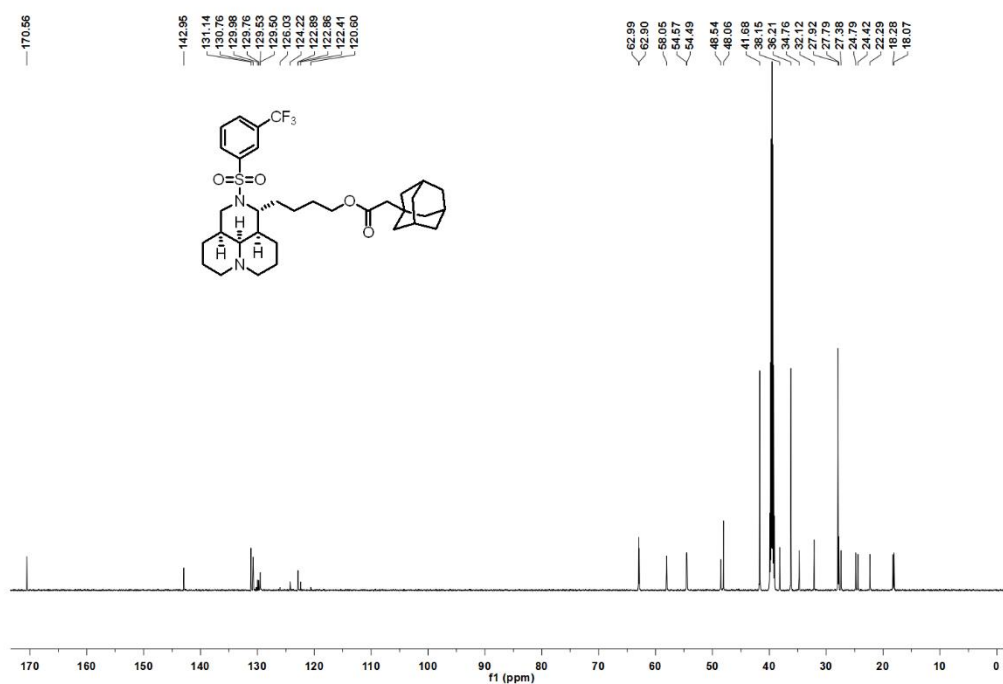

Figure 10S. <sup>13</sup>C NMR spectrum of compound of 9e

PROTON\_01  
VNS-600 PROTON 9f IN DMSO Jul 9 2018

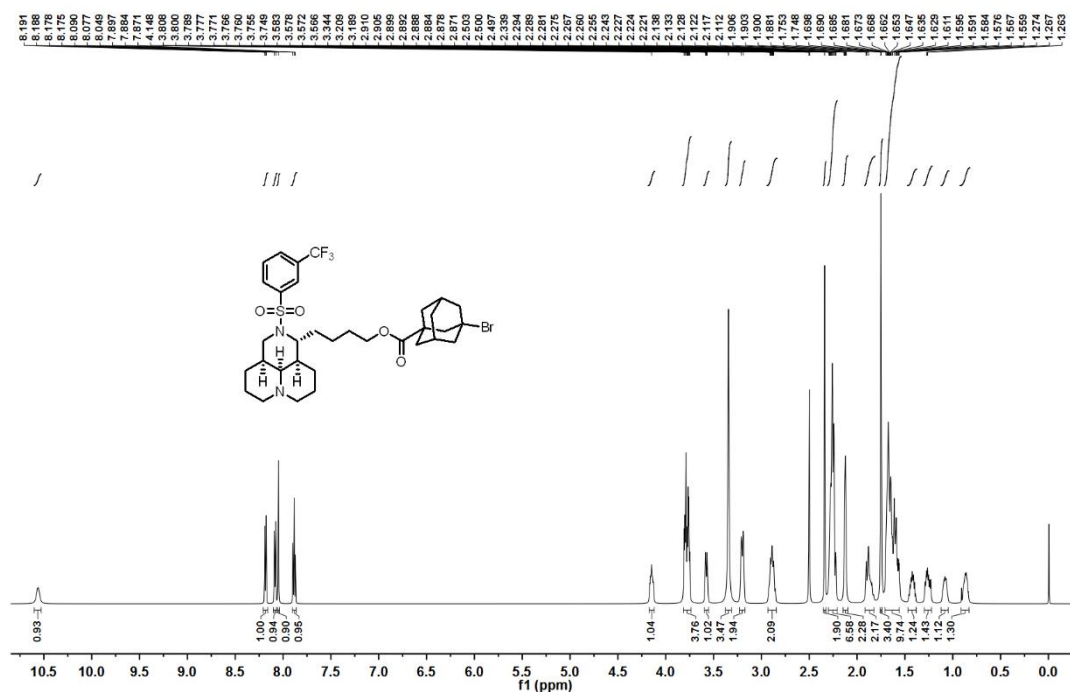

Figure 11S. <sup>1</sup>H NMR spectrum of compound of 9f

CARBON\_01  
VNS-600 CARBON 9f IN DMSO Jul 9 2018

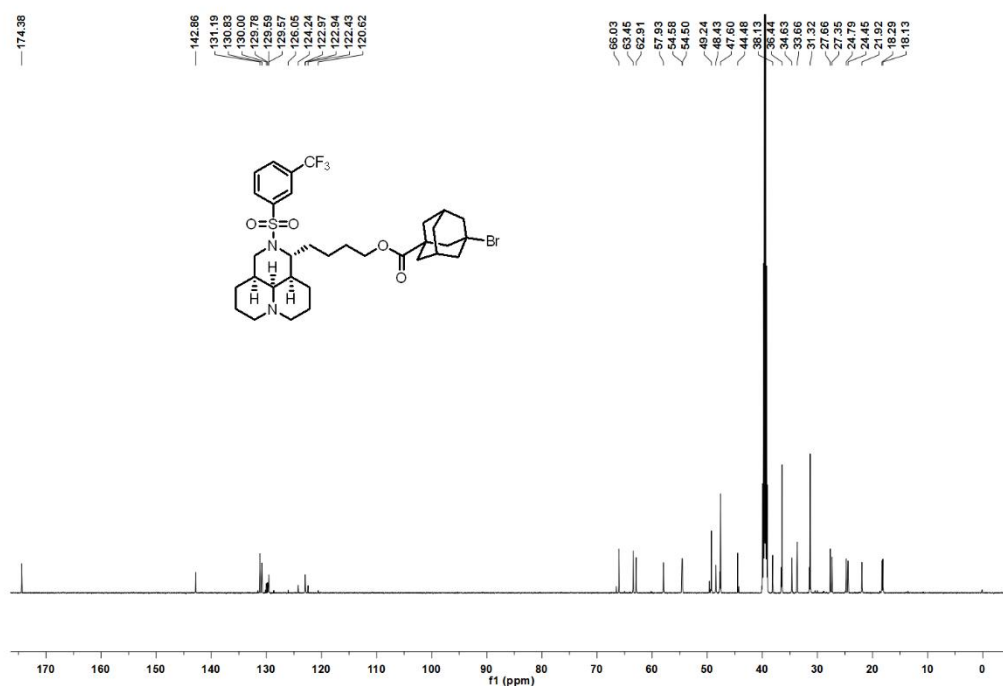

**Figure 12S.**  $^{13}\text{C}$  NMR spectrum of compound of 9f

PROTON\_01  
VNS-600 PROTON 9g IN DMSO Jul 9 2018

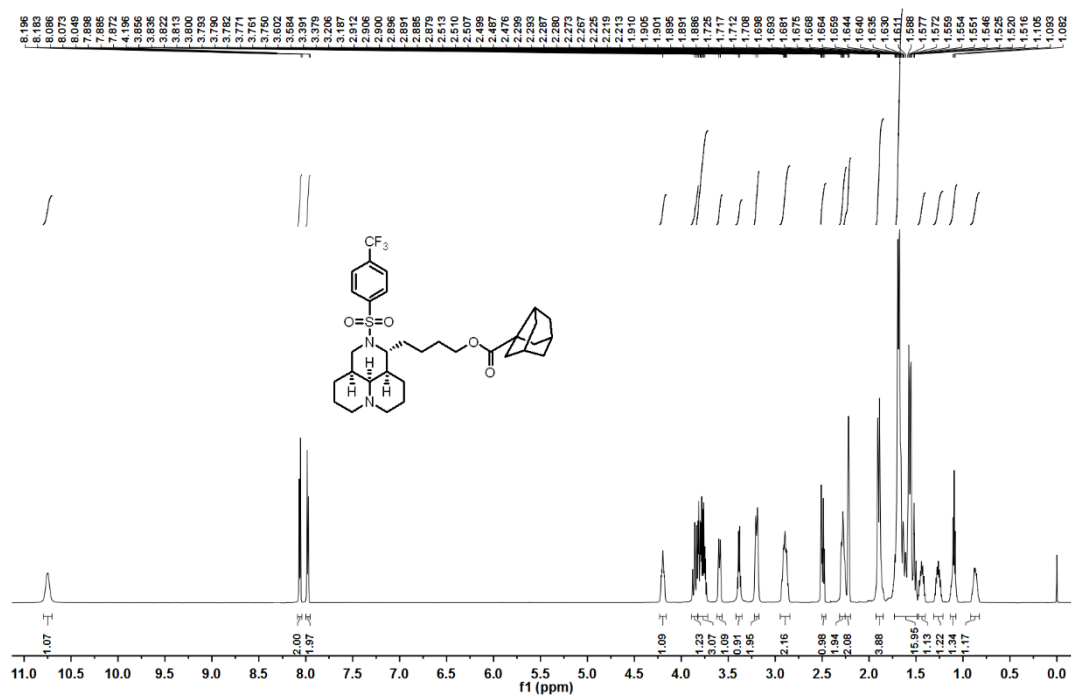

**Figure 13S. <sup>1</sup>H NMR spectrum of compound of 9g**

CARBON\_01  
VNS-600 CARBON 9g IN DMSO Jul 9 2018

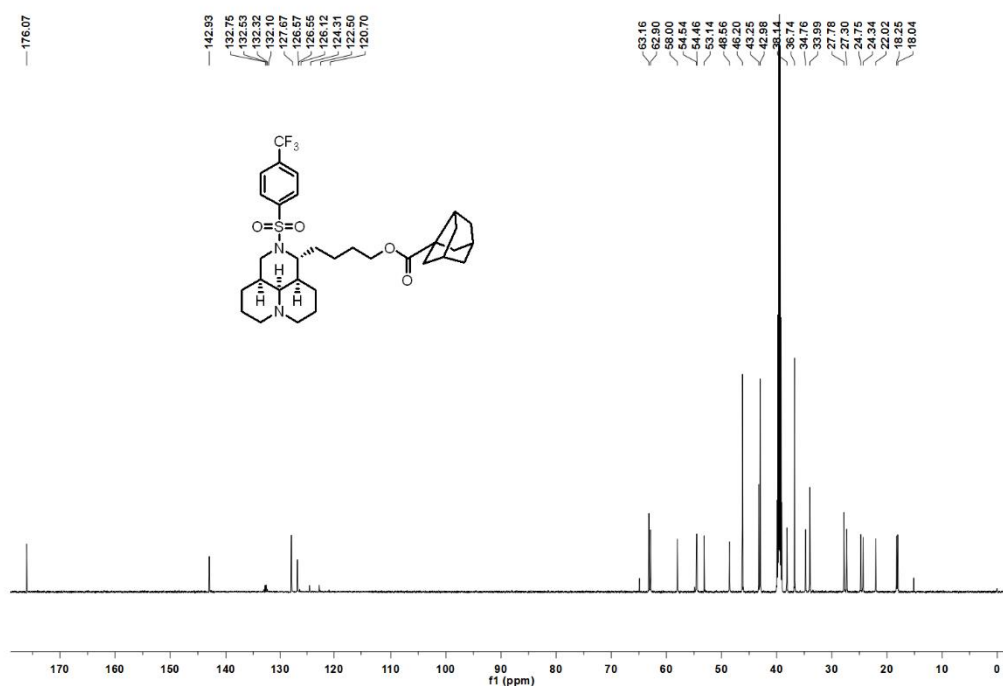

Figure 14S. <sup>13</sup>C NMR spectrum of compound of 9g

PROTON\_01  
VNS-600 PROTON 9h IN DMSO Jul 9 2018

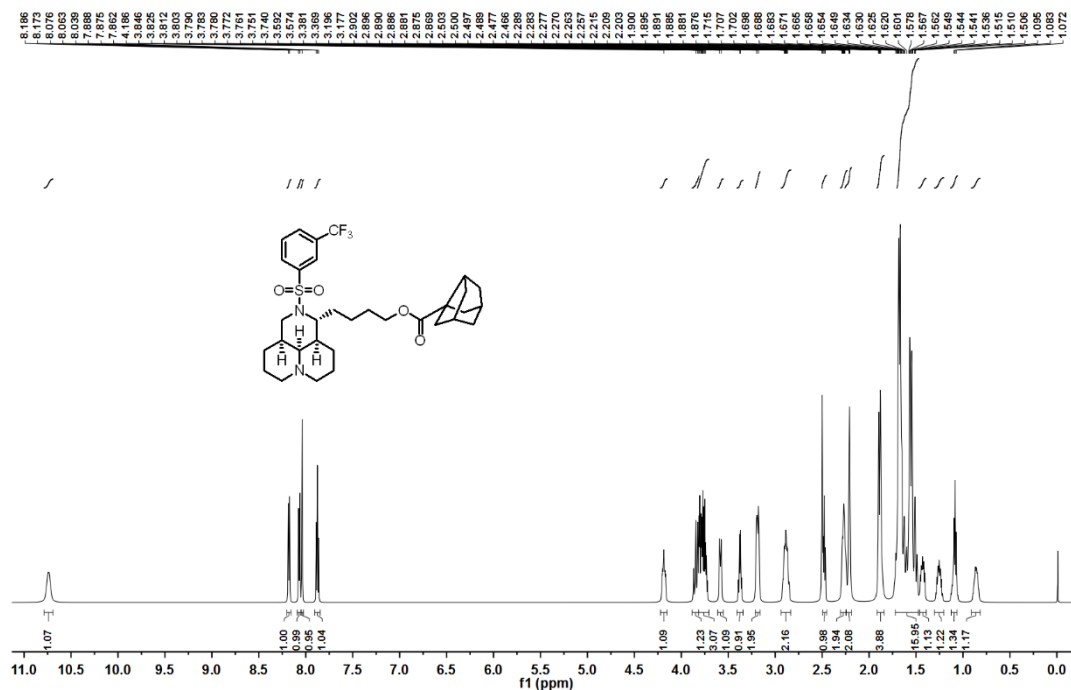

Figure 15S. <sup>1</sup>H NMR spectrum of compound of 9h



CARBON\_01  
VNS-600 CARBON 9h IN DMSO Jul 9 2018

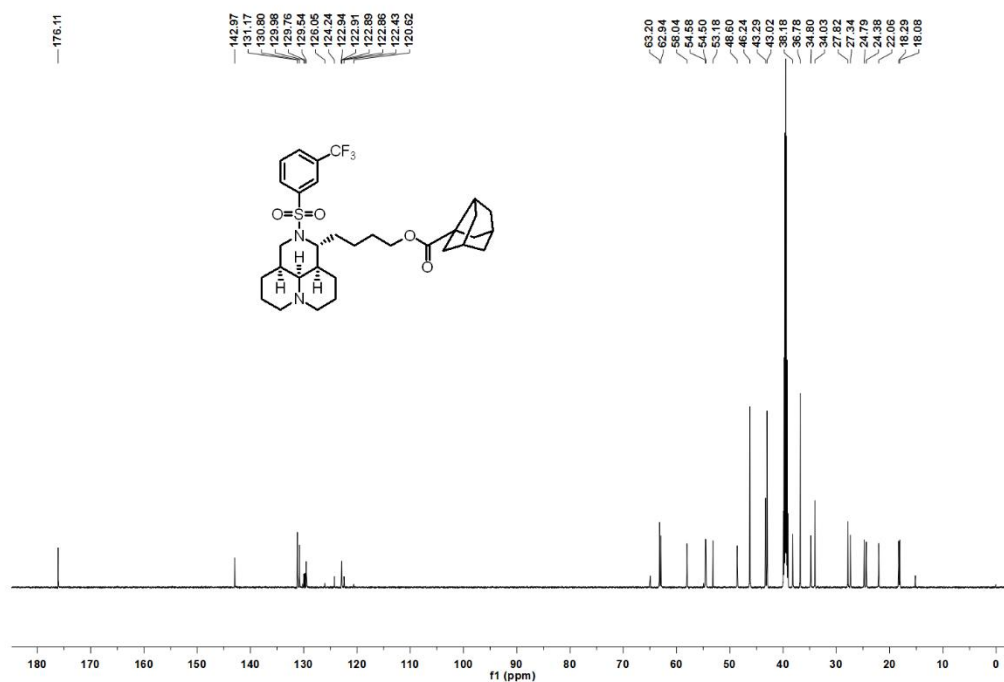

Figure 16S.  $^{13}\text{C}$  NMR spectrum of compound of 9h

PROTON\_01  
VNS-600 PROTON 9i IN DMSO Dec 6 2017

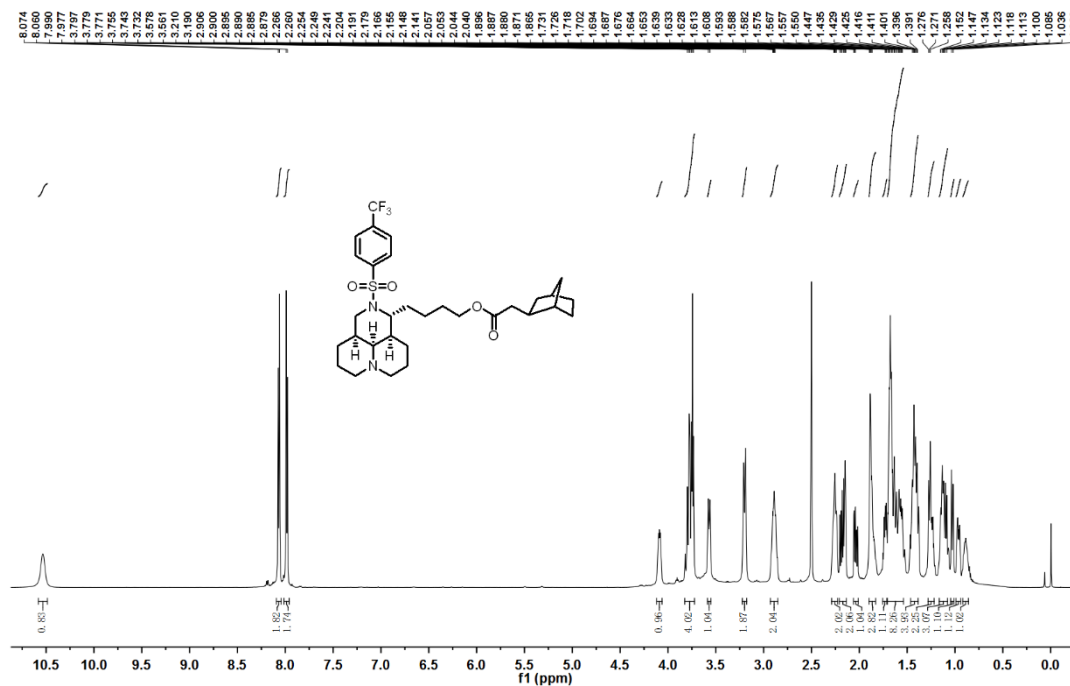

Figure 17S.  $^1\text{H}$  NMR spectrum of compound of 9i

CARBON\_01  
VNS-600 CARBON 9i IN DMSO Dec 6 2017

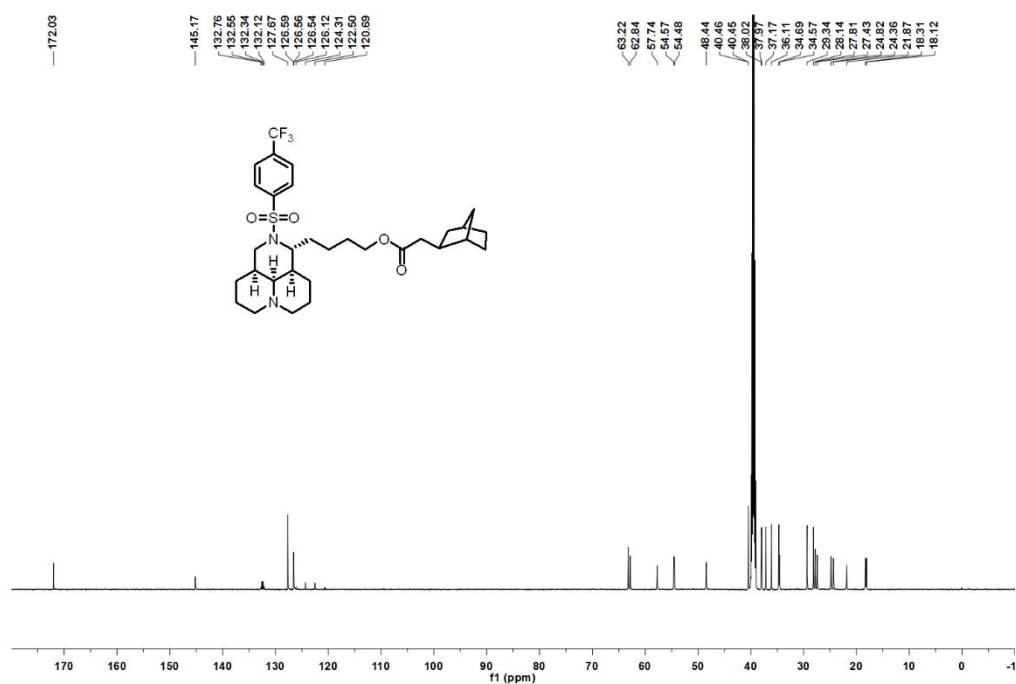

Figure 18S. <sup>13</sup>C NMR spectrum of compound of 9i

PROTON\_01  
VNS-600 PROTON 9j IN DMSO Dec 1 2017

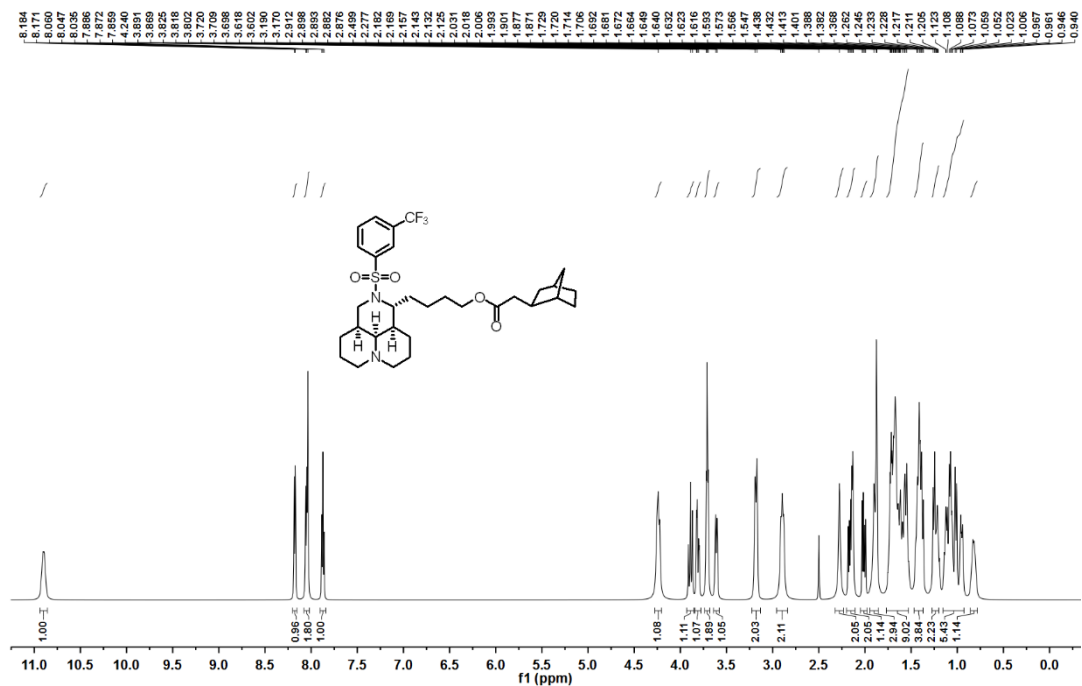

Figure 19S. <sup>1</sup>H NMR spectrum of compound of 9j

CARBON\_01  
VNS-600 CARBON 9j IN DMSO Dec 1 2017

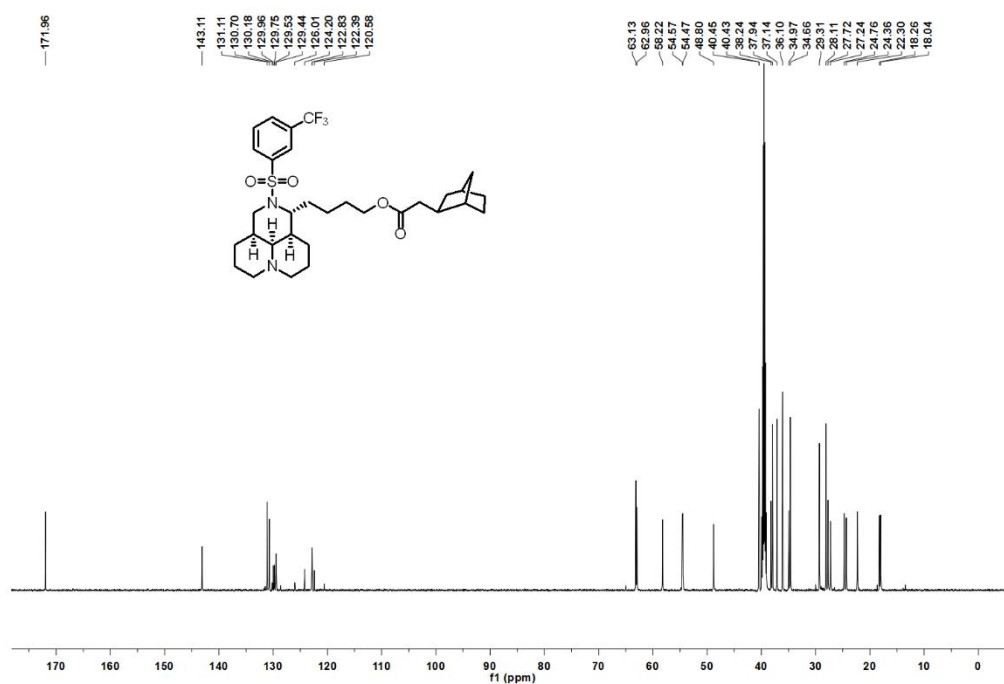

Figure 20S. <sup>13</sup>C NMR spectrum of compound of 9j

PROTON\_01  
VNS-600 PROTON 9k IN DMSO Dec 1 2017

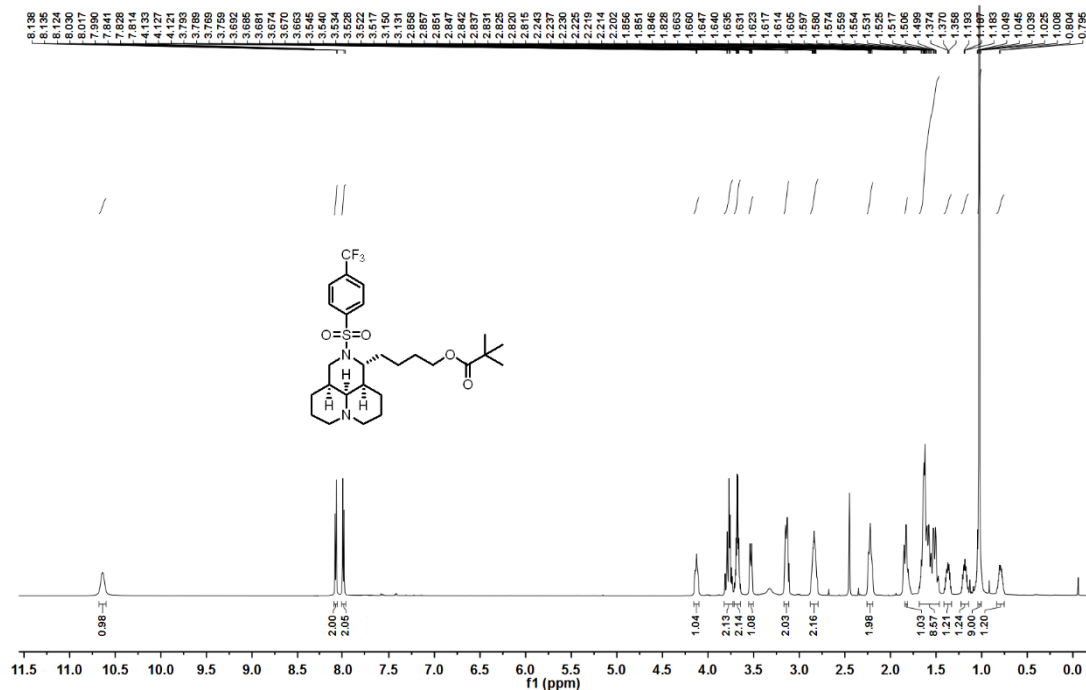

Figure 21S. <sup>1</sup>H NMR spectrum of compound of 9k

CARBON\_01  
VNS-600 CARBON 9k IN DMSO Dec 6 2017

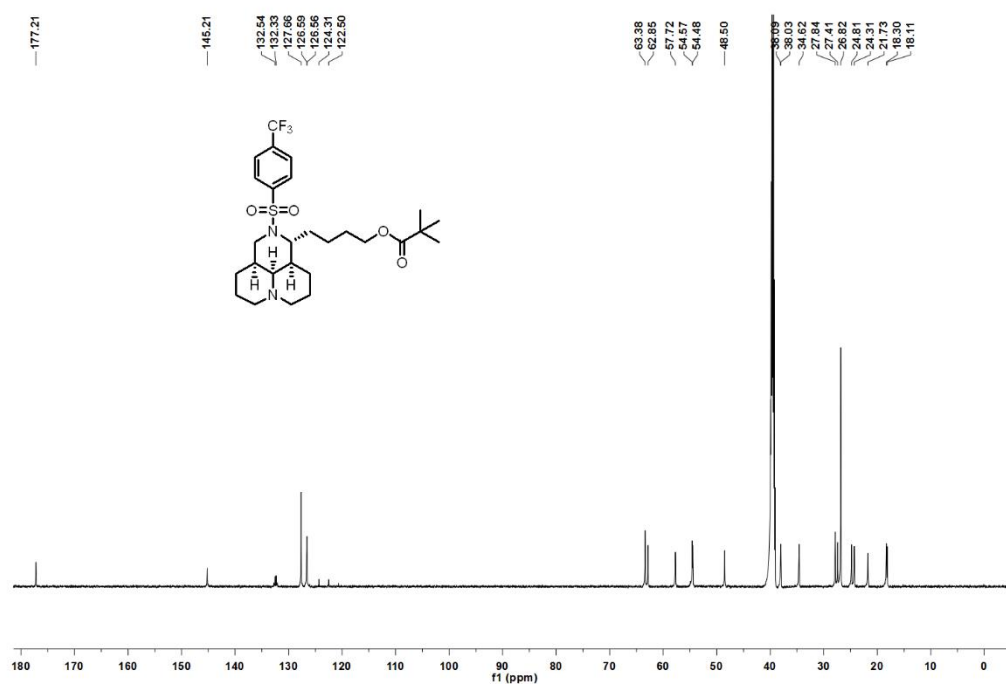

Figure 22S. <sup>13</sup>C NMR spectrum of compound of 9k

PROTON\_01  
VNS-600 PROTON 91 IN DMSO Dec 1 2017

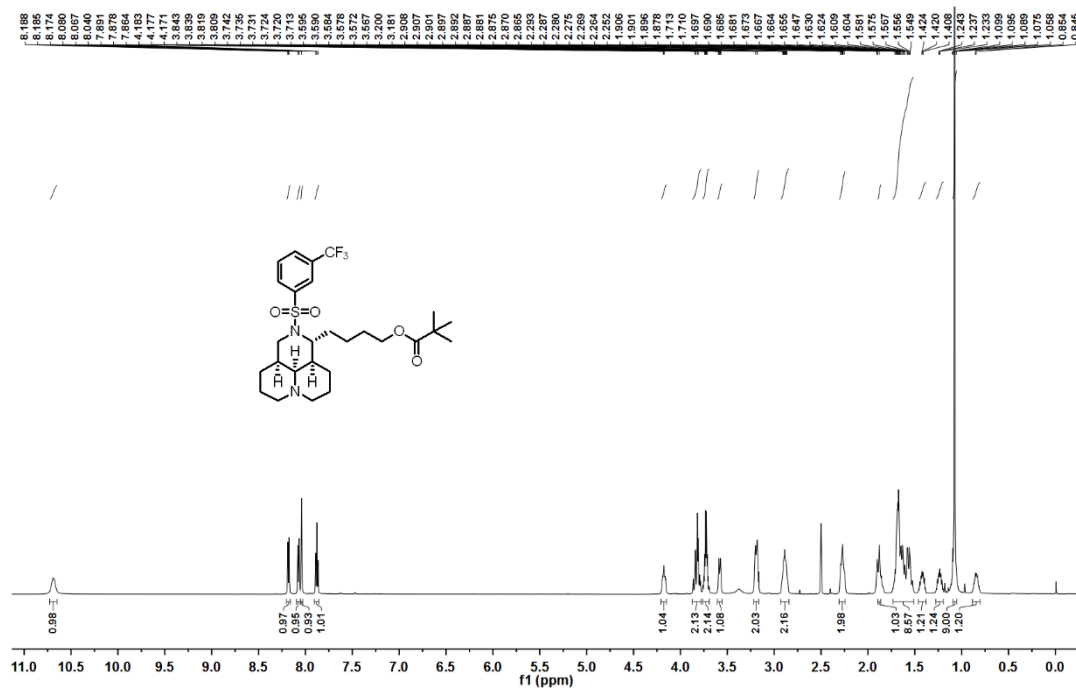

Figure 23S. <sup>1</sup>H NMR spectrum of compound of 9l

CARBON\_01  
VNS-600 CARBON 91 IN DMSO Dec 1 2017

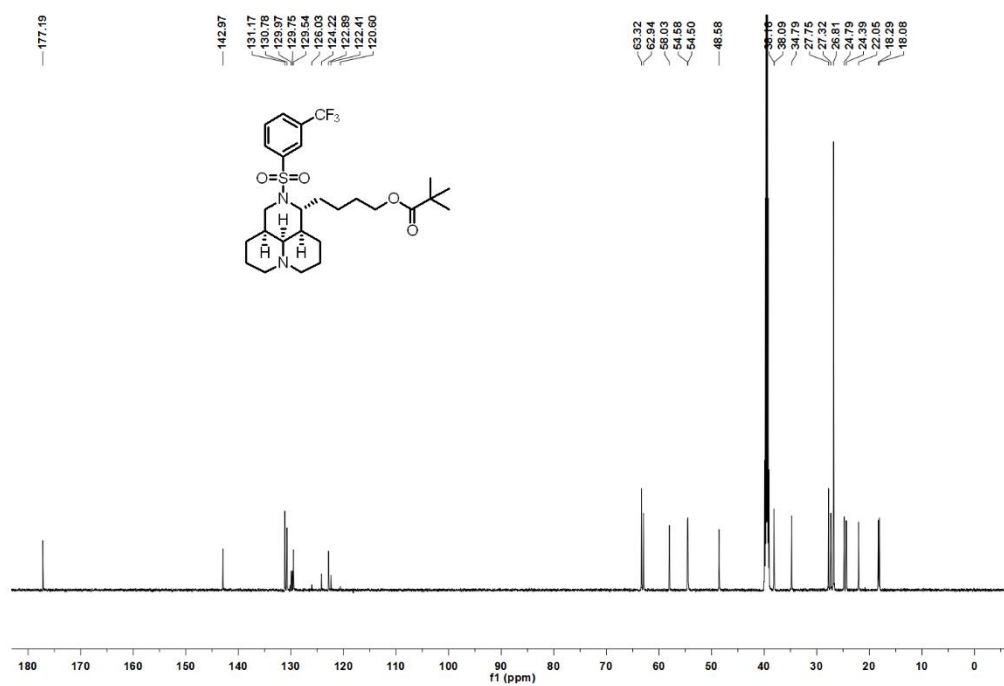

Figure 24S. <sup>13</sup>C NMR spectrum of compound of 9l
